# Supplementary material for: The endocrine disruptor effect of metal nanoparticles mainly depends on their capacity to release metal ions
Source: Royal Society of Chemistry journal article supplement (doi:10.1039/d4en00065j), 2024-01-01
Supplement: d4en00065j1.pdf [file d4en00065j1.pdf]

## Electronic Supplementary Information

**The endocrine disruptor effect of metal nanoparticles mainly depends on their capacity to release metal ions.**

*Peggy Charbonnier<sup>a</sup>, Pierre-Henri Jouneau<sup>b</sup> and Aurélien Deniaud<sup>a\*</sup>*

<sup>a</sup> Univ. Grenoble Alpes, CNRS, CEA, IRIG - Laboratoire de Chimie et Biologie des Métaux,  
F-38000 Grenoble, France

<sup>b</sup> Univ. Grenoble Alpes, CEA, IRIG, MEM, F-38000 Grenoble, France

\* Correspondence should be addressed to [aurelien.deniaud@cea.fr](mailto:aurelien.deniaud@cea.fr)

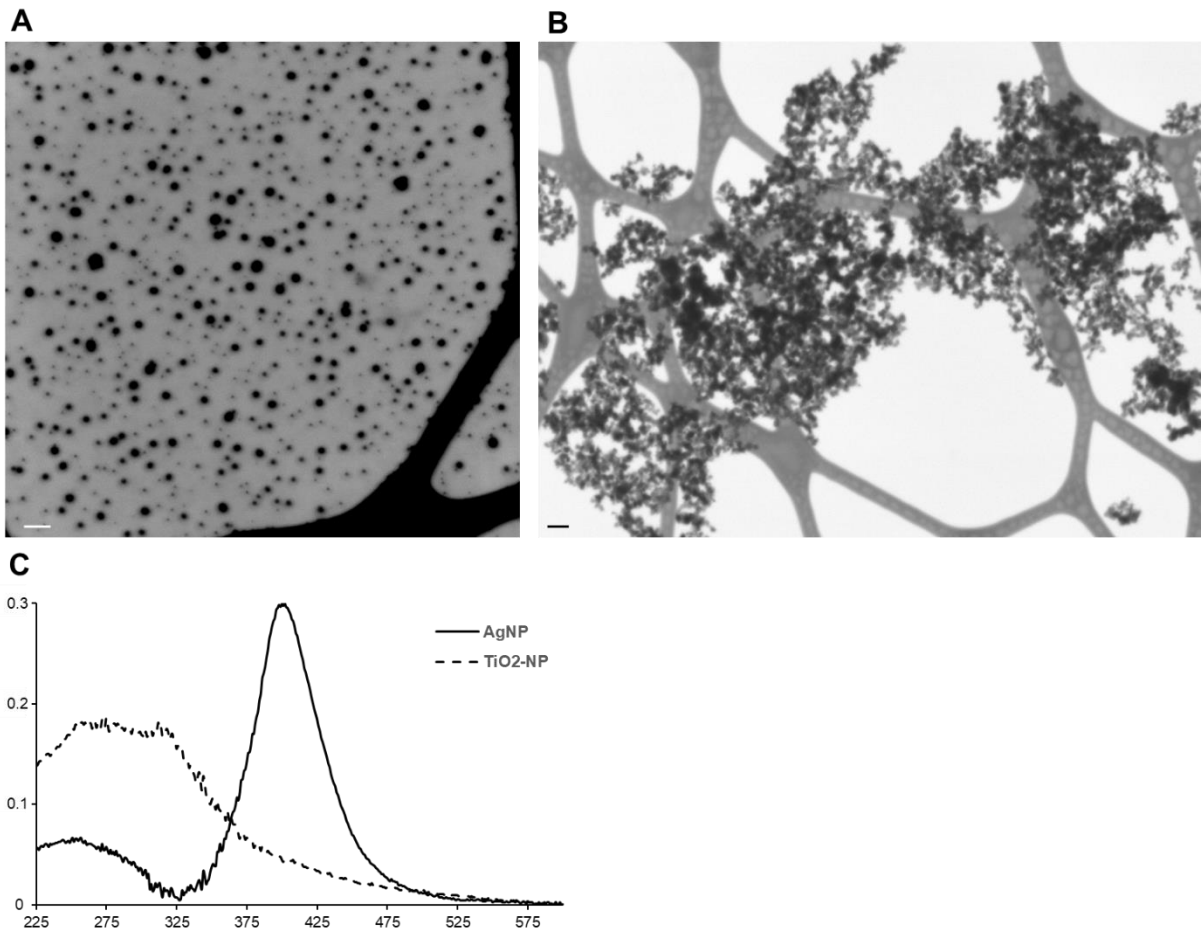

**Fig. S1** Nanoparticle characterization. STEM representative micrographs of AgNP (A) and TiO<sub>2</sub>-NP (B). Scale bars represent 100 nm. (C) UV-visible spectra of AgNP and TiO<sub>2</sub>-NP.
