# Supplementary material for: The endocrine disruptor effect of metal nanoparticles mainly depends on their capacity to release metal ions
Source: Royal Society of Chemistry journal article supplement (doi:10.1039/d4en00065j), 2024-01-01
Supplement: d4en00065j2.pdf [file d4en00065j2.pdf]

## Electronic Supplementary Information

**The endocrine disruptor effect of metal nanoparticles mainly depends on their capacity to release metal ions.**

*Peggy Charbonnier<sup>a</sup>, Pierre-Henri Jouneau<sup>b</sup> and Aurélien Deniaud<sup>a\*</sup>*

<sup>a</sup> Univ. Grenoble Alpes, CNRS, CEA, IRIG - Laboratoire de Chimie et Biologie des Métaux,  
F-38000 Grenoble, France

<sup>b</sup> Univ. Grenoble Alpes, CEA, IRIG, MEM, F-38000 Grenoble, France

\* Correspondence should be addressed to [aurelien.deniaud@cea.fr](mailto:aurelien.deniaud@cea.fr)

**Table S1:** Hydrodynamic diameters and polydispersity index from DLS of both types of NP in water and in different relevant cell culture media, alone or in the presence of different compounds used for cell culture experiments. Zeta potential for both types of NP determined in diluted PBS.

|                             | solvent                          | Main peak                                       |              | Secondary peak |              | Zeta potential (mV) |
|-----------------------------|----------------------------------|-------------------------------------------------|--------------|----------------|--------------|---------------------|
|                             |                                  | diameter (nm)                                   | PDI (%)      | diameter (nm)  | PDI (%)      |                     |
| AgNP                        | H2O                              | 52.6                                            | 6.3          |                |              | -16.3               |
|                             | H2O+T3 (100nM)                   | 54                                              | 9.8          |                |              | -7.9                |
|                             | H2O + 15µM amiodarone            | 70.6                                            | 12.6         |                |              | -3.8                |
|                             | MEM-SVF                          | 61.4                                            | 25.5         |                |              |                     |
|                             | MEM-SVF+T3(100nM)                | 60.2                                            | 22.6         |                |              |                     |
|                             | MEM-SVF+15µM amiodarone          | 63                                              | 10.8         |                |              |                     |
|                             | H2O+1%DMSO                       | 58.2                                            | 19.5         |                |              | -12.9               |
|                             | H2O+1%DMSO+0,1nM 17-MT           | 57.8                                            | 13.2         |                |              | -3.3                |
|                             | H2O+1%DMSO+1mg/ml anastrozole    | 54.8                                            | 10.3         |                |              | -2.9                |
|                             | H2O+1%DMSO+5µM linuron           | 58.8                                            | 14.5         |                |              | -16.4               |
|                             | DMEM-F12+SVF+1%DMSO              | 67.6                                            | 17.2         |                |              |                     |
|                             | DMEM-F12+SVF+1%DMSO+17-MT 10nM   | 70.6                                            | 11.1         |                |              |                     |
|                             | DMEM-F12+SVF+1%DMSO+1mg/ml anast | 68.8                                            | 19.2         |                |              |                     |
|                             | DMEM-F12+SVF+1%DMSO+5µM linuron  | 69.4                                            | 16.5         |                |              |                     |
|                             | H2O+1%DMSO+10pM TCDD             | 55.8                                            | 11.3         |                |              | -16.0               |
|                             | H2O+1%DMSO+1µM luteolin          | 58                                              | 11.9         |                |              | -15.9               |
|                             | MEMalpha 5%SVF                   | 61.6                                            | 10.3         |                |              |                     |
|                             | MEMalpha 5%SVF+10pMTCDD          | 61.4                                            | 10.5         |                |              |                     |
| MEMalpha 5%SVF+1µM luteolin | 59.2                             | 12.4                                            |              |                |              |                     |
| TiO <sub>2</sub> -NP        | H2O                              | 200.6                                           | 11.4         |                |              | -38.3               |
|                             | H2O+T3 (100nM)                   | 216.6                                           | 23.5         |                |              | -42.0               |
|                             | H2O+15µM amiodarone              | 207                                             | 28.5         |                |              | -6.8                |
|                             | MEM-SVF                          | 1204                                            | 48.4         |                |              |                     |
|                             | MEM-SVF+T3(100nM)                | 990                                             | 51           |                |              |                     |
|                             | MEM-SVF+15µM amiodarone          | polydisperse (100 nm to several µm)             |              |                |              |                     |
|                             | H2O+1%DMSO                       | 203.8                                           | 28.4         |                |              | -25.1               |
|                             | H2O+1%DMSO+0,1nM 17-MT           | 200.4                                           | 27.9         | a bit of µm    |              | -20.4               |
|                             | H2O+1%DMSO+1mg/ml anastrozole    | 210.2                                           | 11           | a bit of µm    |              | -21.4               |
|                             | H2O+1%DMSO+5µM linuron           | 231                                             | 23.2         |                |              | -23.7               |
|                             | DMEM-F12+SVF+1%DMSO              | 491.6                                           | 15           | a bit of µm    |              |                     |
|                             | DMEM-F12+SVF+1%DMSO+17-MT 10nM   | polydisperse (100 nm to several µm)             |              |                |              |                     |
|                             | DMEM-F12+SVF+1%DMSO+1mg/ml anast | polydisperse (100 nm to several µm)             |              |                |              |                     |
|                             | DMEM-F12+SVF+1%DMSO+5µM linuron  | polydisperse with a main peak around 200-300 nm |              |                |              |                     |
|                             | H2O+1%DMSO+10pM TCDD             | 184.6                                           | 23           |                |              | -26.4               |
|                             | H2O+1%DMSO+1µM luteolin          | 205.4                                           | 29.1         |                |              | -27.2               |
|                             | MEMalpha 5%SVF                   | 200-400 nm                                      | polydisperse | 1-3 µm         | polydisperse |                     |
|                             | MEMalpha 5%SVF+10pMTCDD          | 200-400 nm                                      | polydisperse | 1-3 µm         | polydisperse |                     |
| MEMalpha 5%SVF+1µM luteolin | 300-350 nm                       | 39.5                                            | polydisperse |                |              |                     |

|                      | HEK293T cells<br>(Thyroid pathway) | AR-EcoScreen cells<br>(Androgen pathway) | DR-EcoScreen cells<br>(Aryl hydrocarbon<br>pathway) |
|----------------------|------------------------------------|------------------------------------------|-----------------------------------------------------|
| AgNP                 | 675 ± 65 μM                        | 330 ± 53 μM                              | > 400 μM                                            |
| TiO <sub>2</sub> -NP | 323 ± 25 μg/mL                     | 90 ± 10 μg/mL                            | 98 ± 32 μg/mL                                       |
| AgNO <sub>3</sub>    | 21 ± 3 μM                          | -                                        | -                                                   |

**Table S2** Determination of the dose lethal for 50% of the cells (LD50) based on Trypan blue assay for the cell types used for each assay.
